# Supplementary material for: A procedure for localisation and electrophysiological characterisation of ion channels heterologously expressed in a plant context
Source: PubMed Central journal article supplement (PMC1352354; doi:10.1186/1746-4811-1-14), 2005-12-19
Supplement: 1746-4811-1-14-S1.pdf [file 1746-4811-1-14-S1.pdf]

## Supplementary material

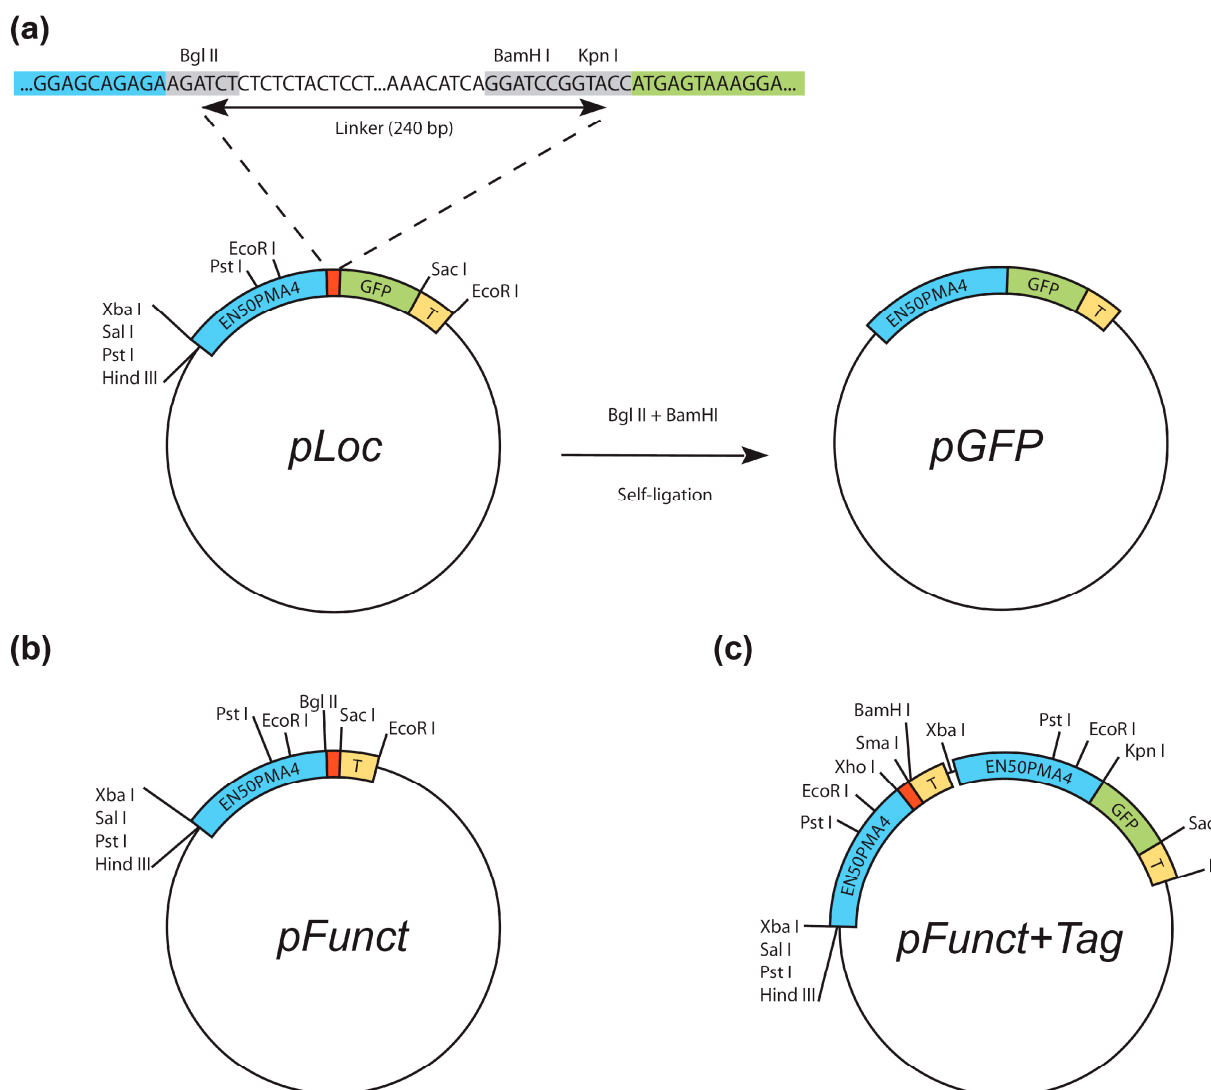

**Figure 1.** Schematic presentation of the plasmids used for the transient expression in Tobacco protoplasts of a protein alone, or in fusion with the GFP, or in co-expression with the GFP. (a) *pLoc* and *pGFP* plasmids used for the expression of a protein with the GFP fused at its C-terminus or of the GFP alone, respectively. For the *pLoc* plasmid, the nucleotide sequences surrounding the restriction sites at the sides of the linker region are indicated for in-frame cloning of the protein. The *pGFP* plasmid results from the *pLoc* plasmid after removal of the *pLoc* linker with a Bgl II – BamH I enzymatic restriction. (b, c) *pFunct* and *pFunct+Tag* plasmids used for the functional expression of a protein alone or, for cell fluo-tagging purpose, in tandem with the GFP, respectively. The main restriction sites are indicated. *EN50PMA4*: modified *PMA4* promoter (Zhao et al., 1999, *Plant Sci.* **149**, 157), 2509 bp; T: nopaline synthase terminator, 267 bp; GFP: enhanced green fluorescent protein; 723 bp. The background plasmid is the *pTZ-19U* plasmid (Stratagene, LaJolla, CA, USA).

## Supplementary material (continued)

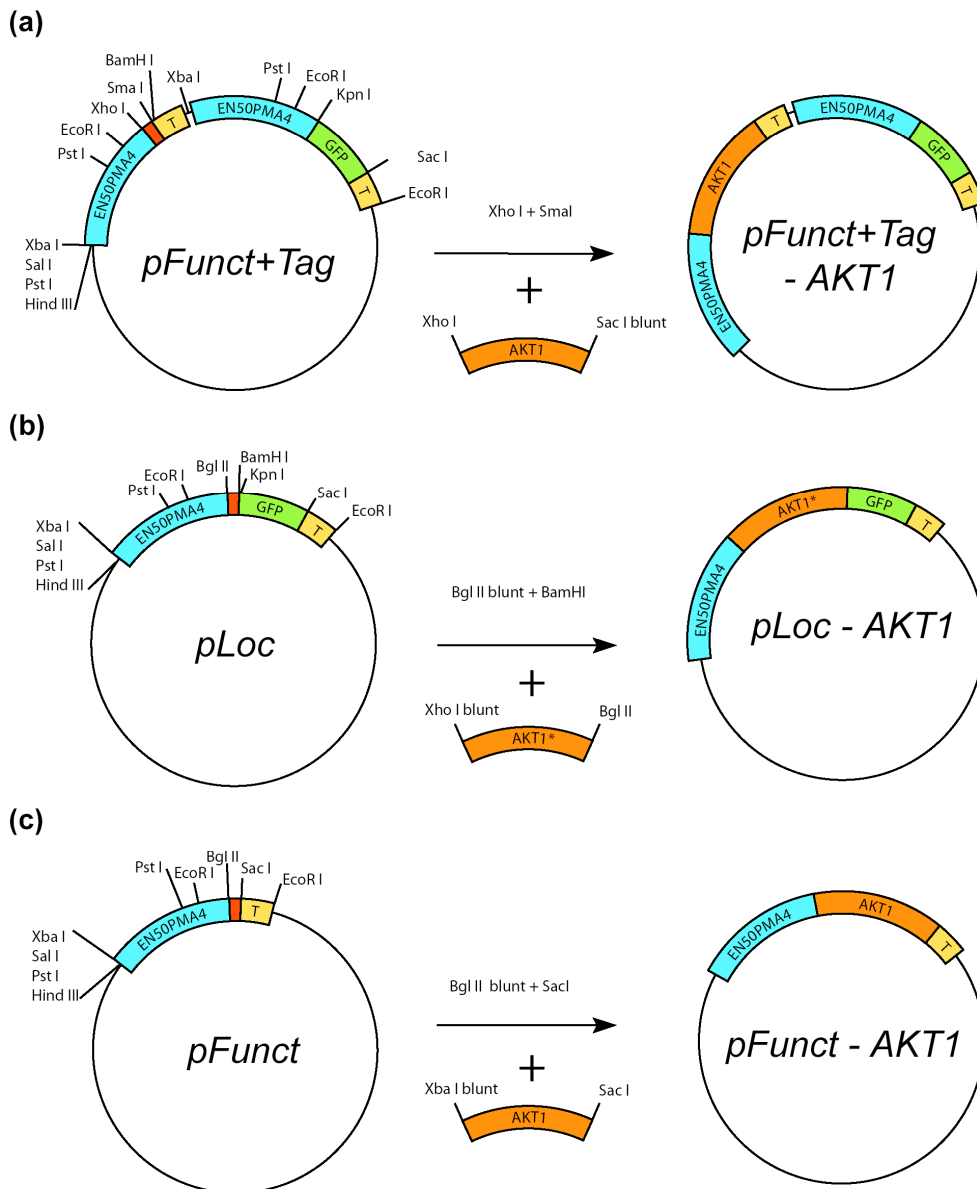

**Figure 2.** Cloning of *AKT1* and *KAT1* cDNAs in the *pFunct+Tag*, *pLoc* and *pFunct* vectors. Only the procedures for *AKT1* are represented. (a) Obtaining of the *pFunct+Tag* – *AKT1* plasmid. The *AKT1* cDNA bordered with *XhoI* and blunt *SacI* sites was cloned in the *pFunct+Tag* plasmid opened with *XhoI* – *SmaI* endonucleases. (b) Obtaining of the *pTag* – *AKT1* plasmid. The *AKT1* cDNA deprived by PCR of its stop codon and bordered with blunt *XhoI* and *BglIII* restriction sites was cloned in frame with the GFP in the *pLoc* plasmid opened with a blunt *BglIII* and *BamHI* enzymatic restriction. (c) Obtaining of the *pFunct* – *AKT1* plasmid. An *AKT1* cDNA fragment bordered by blunt *XbaI* and *SacI* sites was cloned in the *pFunct* plasmid opened with a blunt *BglIII* and *SacI* enzymatic restriction. Cloning *KAT1* cDNA in the *pFunct+Tag*, *pLoc* and *pFunct* vectors used the same restriction sites and endonucleases. The *pFunct* – *KAT1* recombinant vector was obtained by integrating the *KAT1* cDNA bordered with the *BamH I* and *Sac I* restriction sites in the *pFunct* plasmid opened with a *Bgl II* and *Sac I* restriction. The main restriction sites are indicated. EN50PMA4: modified PMA4 promoter (Zhao *et al.*, 1999, *Plant Sci.* **149**, 157), 2509 bp; T: nopaline synthase terminator, 267 bp; GFP: enhanced green fluorescent protein; 723 bp; *AKT1*: *AKT1* cDNA, 2705 bp; *AKT1\**: *AKT1* cDNA deprived of its stop codon.
